# Supplementary material for: Cross-Regional Differences in News Tone and Local Stock Ownership
Source: Atypon-hosted journal article supplement (doi:10.1287/mnsc.2020.3623), 2020-06-24
Supplement: mnsc.2020.3623.sm1.pdf [file mnsc.2020.3623.sm1.pdf]

## Online Appendix

### Cross-regional differences in news tone and local stock ownership

The online appendix contains frequency distribution of the top 20 negative and positive words, definition of control variables, descriptive statistics, and robustness analyses.

**Table A1. List of top 20 negative and positive words**

The table presents the top 20 negative and positive words that occur in the data, along with their frequency distribution and Swedish translation.

| Negative words |           |            |          | Positive words |           |               |             |
|----------------|-----------|------------|----------|----------------|-----------|---------------|-------------|
| Obs.           | Frequency | English    | Swedish  | Obs.           | Frequency | English       | Swedish     |
| 1              | 897,680   | SUING      | STÄMMA   | 1              | 608,169   | GREAT         | STOR        |
| 2              | 614,053   | AGAINST    | MOT      | 2              | 295,907   | GOOD          | BRA         |
| 3              | 519,591   | MISS       | MISS     | 3              | 194,783   | LEADING       | LEDANDE     |
| 4              | 429,728   | LATE       | SENT     | 4              | 153,452   | GAIN          | VINST       |
| 5              | 269,007   | CLOSEOUT   | REA      | 5              | 132,584   | CONFIDENT     | SÄKER       |
| 6              | 229,257   | DISRUPTS   | STÖR     | 6              | 121,811   | HONOR         | ÄRA         |
| 7              | 160,681   | DISGORGES  | LÄMNA    | 7              | 120,962   | OPPORTUNITY   | MÖJLIGHET   |
| 8              | 150,715   | DEMOLISH   | RIVA     | 8              | 118,734   | GREATEST      | STÖRSTA     |
| 9              | 140,602   | VERDICT    | DOM      | 9              | 88,597    | EFFICIENT     | EFFEKTIV    |
| 10             | 131,948   | FORCE      | KRAFT    | 10             | 87,985    | COLLABORATION | SAMARBETE   |
| 11             | 126,075   | DISRUPTED  | STÖRS    | 11             | 80,520    | FRIENDLY      | VÄNLIG      |
| 12             | 123,058   | QUIT       | AVSLUTA  | 12             | 68,278    | ENHANCE       | FÖRBÄTTRA   |
| 13             | 101,150   | DIMINISH   | MINSKA   | 13             | 68,231    | PROFITABLE    | LÖNSAM      |
| 14             | 98,849    | CONCERN    | ORO      | 14             | 59,493    | BOOSTED       | ÖKAT        |
| 15             | 94,455    | ALLEGING   | AVSEENDE | 15             | 58,678    | BETTER        | BÄTTRE      |
| 16             | 90,468    | IMPLICATE  | OMFATTA  | 16             | 56,592    | OPPORTUNITIES | MÖJLIGHETER |
| 17             | 80,323    | STRAIN     | STAM     | 17             | 51,237    | PROFITABILITY | LÖNSAMHET   |
| 18             | 79,890    | TERMINATED | AVSLUTAS | 18             | 48,355    | SUCCESS       | FRAMGÅNG    |
| 19             | 73,159    | THREAT     | HOT      | 19             | 45,764    | POSITIVE      | POSITIVT    |
| 20             | 67,982    | EMBARRASS  | GENERA   | 20             | 45,319    | STABLE        | STABIL      |

**Table A2. Descriptive statistics on the change in local and non-local portfolios**

The table presents descriptive statistics on the measures of change in portfolios. Adjustment to share held for splits, reverse splits, own share bonuses, and share bonuses via M&As are made. Adjustment factors are obtained from FinBas. Values are winsorized at 1 and 99 pct. levels. The unit of analysis is the investor-time. The test of mean difference of the measures in local and non-local portfolios is provided. The standard errors are clustered on district. Bold marked difference coefficients and t-values indicate significance at the 5% level.

|            | Local portfolios |                 |            | Non-local portfolios |                 |            |
|------------|------------------|-----------------|------------|----------------------|-----------------|------------|
|            | d in share       | d in adj. share | d in value | d in share           | d in adj. share | d in value |
|            | (1)              | (2)             | (3)        | (4)                  | (5)             | (6)        |
| Min        | -0.836           | -0.874          | -0.806     | -0.833               | -0.859          | -0.809     |
| Mean       | 0.125            | 0.161           | 0.107      | 0.114                | 0.145           | 0.115      |
| Std. error | 0.004            | 0.007           | 0.003      | 0.002                | 0.002           | 0.004      |
| Max        | 5.556            | 7.286           | 4.596      | 5.233                | 6.665           | 4.78       |
| Std. dev.  | 0.748            | 0.949           | 0.638      | 0.701                | 0.868           | 0.656      |
| N          | 14,697,625       | 14,697,625      | 14,697,625 | 39,220,400           | 39,220,400      | 39,220,400 |
|            | (1-4)            | (2-5)           | (3-6)      |                      |                 |            |
| Mean diff. | <b>0.011</b>     | <b>0.016</b>    | -0.008     |                      |                 |            |
| t-value    | <b>2.23</b>      | <b>2.37</b>     | -1.618     |                      |                 |            |

**Table A3. Definition of the control variables**

| Firm/Stock time (quarter/year) level variables |                                                                                                                                                                                                                                                                                                                                                                                                                                                                                                                                                                                           |
|------------------------------------------------|-------------------------------------------------------------------------------------------------------------------------------------------------------------------------------------------------------------------------------------------------------------------------------------------------------------------------------------------------------------------------------------------------------------------------------------------------------------------------------------------------------------------------------------------------------------------------------------------|
| <i>Leverage:</i>                               | The ratio of debt to total assets of the firm at year end.                                                                                                                                                                                                                                                                                                                                                                                                                                                                                                                                |
| <i>ROA:</i>                                    | Return on Assets is measured by dividing net income by average total assets: $ROA_t = \frac{Net\ Income_t}{(TA_t + TA_{t+1})/2}$ , where <i>Net Income</i> <sub><i>t</i></sub> and Total Assets ( <i>TA</i> ) are at year end.                                                                                                                                                                                                                                                                                                                                                            |
| <i>Tangibility:</i>                            | The ratio of the firm's fixed assets to total assets at year end.                                                                                                                                                                                                                                                                                                                                                                                                                                                                                                                         |
| <i>MktCap:</i>                                 | The natural logarithm of the market capitalization of the firm at quarter end.                                                                                                                                                                                                                                                                                                                                                                                                                                                                                                            |
| <i>MTB:</i>                                    | The market to book ratio of the stock at quarter end.                                                                                                                                                                                                                                                                                                                                                                                                                                                                                                                                     |
| <i>Liquidity:</i>                              | The average trading volume of the stock during quarter divided by the stock market valuation at quarter end.                                                                                                                                                                                                                                                                                                                                                                                                                                                                              |
| <i>Return:</i>                                 | The average monthly stock return of the firm over the quarter. The monthly closing prices are used to measure returns.                                                                                                                                                                                                                                                                                                                                                                                                                                                                    |
| <i>Volatility:</i>                             | The standard deviation of the firm's daily returns during a quarter.                                                                                                                                                                                                                                                                                                                                                                                                                                                                                                                      |
| <i>Dist. float:</i>                            | The ratio of the stock market capitalization of the firm to its free float. Free float ownership is calculated as: $DISTFLOAT_t = \frac{Market\ Value_t}{(Market\ Value_t - Price_t * (TSO_t - OS_t))}$ , where <i>Market Value</i> <sub><i>t</i></sub> is the market value of the stock <i>j</i> , <i>TSO</i> <sub><i>t</i></sub> is total shares outstanding and <i>OS</i> <sub><i>t</i></sub> is firm's own shares.                                                                                                                                                                    |
| <i>Div. yield:</i>                             | The current dividend yield of the firm is calculated as dividing the cash dividend payment at <i>t</i> by the unadjusted price at <i>t</i> . Div. yield is then matched to the following quarter since dividend payment can occur during the quarter.                                                                                                                                                                                                                                                                                                                                     |
| <i>Basspread:</i>                              | The bid–ask spread of stock is calculated as the volume-weighted average of the daily closing bid–ask spread during the quarter.                                                                                                                                                                                                                                                                                                                                                                                                                                                          |
| <i>Beta:</i>                                   | The beta coefficient of the CAPM during a quarter is estimated using daily stock returns and the Nasdaq OMX return index as the return of the market portfolio. Closing daily stock prices are obtained from the national finance data center via SHoF, closing OMX index prices are obtained from Nasdaq OMX, and daily risk free rate of returns, three-months treasury bills (SSVX3M), are obtained from the Central Bank of Sweden (Riksbanken). Since SSVX3M is presented as simple yearly treasury bills rate on Riksbanken's webpage, it is divided by 365 to obtain the daily rf. |
| <i>Firm age:</i>                               | Firm age is measured as the logarithm of the number of months from the IPO.                                                                                                                                                                                                                                                                                                                                                                                                                                                                                                               |
| <i>Fixed assets:</i>                           | Fixed assets (in MSEK) of firm is at quarter end.                                                                                                                                                                                                                                                                                                                                                                                                                                                                                                                                         |
| <i>Size:</i>                                   | The natural logarithm of the firm's total assets at year end.                                                                                                                                                                                                                                                                                                                                                                                                                                                                                                                             |
| <i>Revenue:</i>                                | Sales (in MSEK) are at year end.                                                                                                                                                                                                                                                                                                                                                                                                                                                                                                                                                          |
| Individual variables                           |                                                                                                                                                                                                                                                                                                                                                                                                                                                                                                                                                                                           |
| <i>Gender:</i>                                 | Gender dummy takes the value of 1 for males and 0 for females.                                                                                                                                                                                                                                                                                                                                                                                                                                                                                                                            |
| <i>Age:</i>                                    | The age of the individual investors. Individuals below age 18 and above age 75 are dropped.                                                                                                                                                                                                                                                                                                                                                                                                                                                                                               |
| <i>No. trades:</i>                             | The number of trades the individual makes on a stock in the dataset.                                                                                                                                                                                                                                                                                                                                                                                                                                                                                                                      |
| <i>No. passive period:</i>                     | The number of periods the investor has been passive until the trade at <i>t</i> .                                                                                                                                                                                                                                                                                                                                                                                                                                                                                                         |

**Table A4. Robustness analyses of the measurement of republishing news**

The table shows results from the robustness analyses of the measurement of republishing news. The sample that news is republished in the next quarter in different locations (see Table 3 in the paper) is used. Analyses are rerun by comparing the current news to previous five (Panel A), ten (Panel B), and fifteen (Panel C) news stories by using dissimilarity index cutoff value of 50, 100, and 150. To save space, the results from local trades and the measure change in adjusted share are shown, although all the regressions include the intercept, control variables, district and time fixed effects are suppressed in the panels below. Standard errors are clustered on district and time. The bold marked coefficients (and t-values) are significant at the 5% level.

Panel A. Results from comparing the current news to previous five news stories.

| Measure 5-50   | First news is national |               | National news is republished |              | First news is local |               | Local news is republished |              |
|----------------|------------------------|---------------|------------------------------|--------------|---------------------|---------------|---------------------------|--------------|
|                | d in adj. share        | t-values      | d in adj. share              | t-values     | d in adj. share     | t-values      | d in adj. share           | t-values     |
| News           | <b>0.004</b>           | <b>67.02</b>  | <b>0.004</b>                 | <b>66.18</b> | <b>-0.001</b>       | <b>-14.13</b> | <b>-0.0002</b>            | <b>-3.13</b> |
| First pos      | <b>0.059</b>           | <b>4.70</b>   | <b>-0.176</b>                | <b>-7.00</b> | <b>0.034</b>        | <b>9.43</b>   | 0.000                     | .            |
| First neg      | <b>0.040</b>           | <b>25.48</b>  | 0.041                        | 1.71         | <b>-0.077</b>       | <b>-37.35</b> | <b>-0.155</b>             | <b>-3.10</b> |
| News*First pos | <b>0.008</b>           | <b>3.46</b>   | <b>-0.033</b>                | <b>-3.56</b> | <b>0.005</b>        | <b>4.89</b>   | 0.000                     | .            |
| News*First neg | <b>-0.007</b>          | <b>-13.58</b> | -0.015                       | -1.43        | <b>0.004</b>        | <b>10.70</b>  | <b>0.096</b>              | <b>3.74</b>  |
| Obs.           | 3,187,164              |               | 3,187,164                    |              | 1,595,120           |               | 1,595,120                 |              |
| R-square       | 0.093                  |               | 0.093                        |              | 0.078               |               | 0.076                     |              |
| F-value        | 218.98                 |               | 218.45                       |              | 202.08              |               | 223.93                    |              |

| Measure 5-100  | d in adj. share | t-values       |
|----------------|-----------------|---------------|-----------------|---------------|-----------------|---------------|-----------------|----------------|
|                | News            | <b>0.004</b>  | <b>69.38</b>    | <b>0.004</b>  | <b>68.09</b>    | <b>-0.001</b> | <b>-15.06</b>   | <b>-0.0002</b> |
| First pos      | <b>-0.196</b>   | <b>-7.40</b>  | <b>0.114</b>    | <b>9.69</b>   | <b>0.022</b>    | <b>7.83</b>   | <b>-0.143</b>   | <b>-3.61</b>   |
| First neg      | <b>0.068</b>    | <b>45.30</b>  | <b>-0.068</b>   | <b>-25.39</b> | <b>-0.067</b>   | <b>-37.28</b> | <b>-0.154</b>   | <b>-3.09</b>   |
| News*First pos | <b>0.041</b>    | <b>7.52</b>   | <b>-0.051</b>   | <b>-8.97</b>  | <b>0.011</b>    | <b>14.84</b>  | 0.000           | .              |
| News*First neg | <b>-0.009</b>   | <b>-25.33</b> | <b>-0.001</b>   | <b>-2.93</b>  | <b>0.002</b>    | <b>5.99</b>   | <b>0.077</b>    | <b>3.03</b>    |
| Obs.           | 3,187,164       |               | 3,187,164       |               | 1,595,120       |               | 1,595,120       |                |
| R-square       | 0.093           |               | 0.093           |               | 0.078           |               | 0.076           |                |
| F-value        | 219.90          |               | 218.64          |               | 202.54          |               | 224.33          |                |

| Measure 5-150  | d in adj. share | t-values       |
|----------------|-----------------|---------------|-----------------|---------------|-----------------|---------------|-----------------|----------------|
|                | News            | <b>0.005</b>  | <b>75.91</b>    | <b>0.005</b>  | <b>73.18</b>    | <b>-0.001</b> | <b>-15.74</b>   | <b>-0.0002</b> |
| First pos      | <b>-0.187</b>   | <b>-29.34</b> | <b>-0.162</b>   | <b>-13.62</b> | <b>-0.001</b>   | <b>-0.40</b>  | -0.003          | -0.07          |
| First neg      | <b>0.058</b>    | <b>38.66</b>  | <b>0.139</b>    | <b>42.23</b>  | <b>-0.052</b>   | <b>-31.65</b> | 0.010           | 0.15           |
| News*First pos | <b>0.038</b>    | <b>17.56</b>  | <b>-0.013</b>   | <b>-2.27</b>  | <b>0.012</b>    | <b>16.17</b>  | 0.000           | .              |
| News*First neg | <b>-0.004</b>   | <b>-14.73</b> | <b>-0.023</b>   | <b>-61.13</b> | <b>0.002</b>    | <b>9.02</b>   | -0.024          | -0.73          |
| Obs.           | 3,187,164       |               | 3,187,164       |               | 1,595,120       |               | 1,595,120       |                |
| R-square       | 0.094           |               | 0.095           |               | 0.078           |               | 0.076           |                |
| F-value        | 219.18          |               | 226.48          |               | 201.78          |               | 224.34          |                |

Panel B. Results from comparing the current news to previous ten news stories.

| Measure 10-50  | First news is national |               | National news is republished |              | First news is local |               | Local news is republished |              |
|----------------|------------------------|---------------|------------------------------|--------------|---------------------|---------------|---------------------------|--------------|
|                | d in adj. share        | t-values      | d in adj. share              | t-values     | d in adj. share     | t-values      | d in adj. share           | t-values     |
| News           | <b>0.005</b>           | <b>79.75</b>  | <b>0.004</b>                 | <b>66.42</b> | <b>-0.001</b>       | <b>-13.93</b> | <b>-0.0002</b>            | <b>-3.05</b> |
| First pos      | 0.0001                 | 0.03          | <b>-0.169</b>                | <b>-6.92</b> | <b>0.034</b>        | <b>9.32</b>   | 0.000                     | .            |
| First neg      | <b>0.108</b>           | <b>40.96</b>  | <b>0.072</b>                 | <b>7.55</b>  | <b>-0.074</b>       | <b>-36.11</b> | <b>-0.156</b>             | <b>-3.12</b> |
| News*First pos | 0.002                  | 0.81          | <b>-0.033</b>                | <b>-3.43</b> | <b>0.005</b>        | <b>4.91</b>   | 0.000                     | .            |
| News*First neg | <b>-0.018</b>          | <b>-27.08</b> | <b>-0.031</b>                | <b>-7.28</b> | <b>0.004</b>        | <b>9.51</b>   | <b>0.101</b>              | <b>4.00</b>  |
| Obs.           | 3,187,164              |               | 3,187,164                    |              | 1,595,120           |               | 1,595,120                 |              |
| R-square       | 0.094                  |               | 0.093                        |              | 0.078               |               | 0.076                     |              |
| F-value        | 220.05                 |               | 218.24                       |              | 200.95              |               | 224.30                    |              |

| <b>Measure 10-100</b> | d in adj. share | t-values      | d in adj. share | t-values      | d in adj. share | t-values      | d in adj. share | t-values     |
|-----------------------|-----------------|---------------|-----------------|---------------|-----------------|---------------|-----------------|--------------|
| News                  | <b>0.005</b>    | <b>80.05</b>  | <b>0.004</b>    | <b>67.39</b>  | <b>-0.001</b>   | <b>-15.94</b> | <b>-0.0002</b>  | <b>-3.20</b> |
| First pos             | <b>-0.136</b>   | <b>-6.67</b>  | <b>0.088</b>    | <b>7.47</b>   | <b>0.018</b>    | <b>6.42</b>   | -0.053          | -1.92        |
| First neg             | <b>0.079</b>    | <b>41.49</b>  | <b>-0.048</b>   | <b>-21.03</b> | <b>-0.066</b>   | <b>-35.57</b> | 0.015           | 1.60         |
| News*First pos        | <b>0.032</b>    | <b>6.96</b>   | <b>-0.046</b>   | <b>-7.96</b>  | <b>0.011</b>    | <b>14.82</b>  | 0.000           | .            |
| News*First neg        | <b>-0.017</b>   | <b>-39.94</b> | <b>-0.002</b>   | <b>-6.88</b>  | <b>0.002</b>    | <b>5.69</b>   | <b>-0.009</b>   | <b>-2.62</b> |
| Obs.                  | 3,187,164       |               | 3,187,164       |               | 1,595,120       |               | 1,595,120       |              |
| R-square              | 0.094           |               | 0.093           |               | 0.078           |               | 0.076           |              |
| F-value               | 219.16          |               | 218.95          |               | 204.04          |               | 224.29          |              |

| <b>Measure 10-150</b> | d in adj. share | t-values      | d in adj. share | t-values      | d in adj. share | t-values      | d in adj. share | t-values     |
|-----------------------|-----------------|---------------|-----------------|---------------|-----------------|---------------|-----------------|--------------|
| News                  | <b>0.004</b>    | <b>72.96</b>  | <b>0.004</b>    | <b>71.51</b>  | <b>-0.001</b>   | <b>-13.64</b> | <b>-0.0002</b>  | <b>-3.42</b> |
| First pos             | <b>-0.134</b>   | <b>-24.85</b> | <b>-0.119</b>   | <b>-12.98</b> | <b>-0.016</b>   | <b>-6.03</b>  | -0.032          | -1.15        |
| First neg             | <b>0.037</b>    | <b>29.11</b>  | <b>0.093</b>    | <b>34.94</b>  | <b>-0.038</b>   | <b>-25.13</b> | -0.010          | -1.22        |
| News*First pos        | <b>0.030</b>    | <b>16.81</b>  | <b>-0.012</b>   | <b>-2.68</b>  | <b>0.013</b>    | <b>18.59</b>  | 0.000           | .            |
| News*First neg        | <b>-0.003</b>   | <b>-12.85</b> | <b>-0.018</b>   | <b>-55.43</b> | <b>0.004</b>    | <b>15.48</b>  | <b>-0.008</b>   | <b>-2.44</b> |
| Obs.                  | 3,187,164       |               | 3,187,164       |               | 1,595,120       |               | 1,595,120       |              |
| R-square              | 0.093           |               | 0.094           |               | 0.077           |               | 0.076           |              |
| F-value               | 218.83          |               | 222.66          |               | 205.62          |               | 224.27          |              |

Panel C. Results from comparing the current news to previous fifteen news stories.

| <b>Measure 15-50</b> | First news is national |               | National news is republished |              | First news is local |               | Local news is republished |              |
|----------------------|------------------------|---------------|------------------------------|--------------|---------------------|---------------|---------------------------|--------------|
|                      | d in adj. share        | t-values      | d in adj. share              | t-values     | d in adj. share     | t-values      | d in adj. share           | t-values     |
| News                 | <b>0.005</b>           | <b>80.43</b>  | <b>0.004</b>                 | <b>66.42</b> | <b>-0.001</b>       | <b>-15.96</b> | <b>-0.0002</b>            | <b>-3.03</b> |
| First pos            | -0.019                 | -1.93         | <b>-0.169</b>                | <b>-6.92</b> | <b>0.040</b>        | <b>10.42</b>  | 0.000                     | .            |
| First neg            | <b>0.108</b>           | <b>43.24</b>  | <b>0.072</b>                 | <b>7.55</b>  | <b>-0.083</b>       | <b>-35.59</b> | <b>-0.156</b>             | <b>-3.12</b> |
| News*First pos       | -0.003                 | -1.15         | <b>-0.033</b>                | <b>-3.43</b> | <b>0.004</b>        | <b>3.39</b>   | 0.000                     | .            |
| News*First neg       | <b>-0.016</b>          | <b>-27.45</b> | <b>-0.031</b>                | <b>-7.28</b> | <b>0.005</b>        | <b>20.01</b>  | <b>0.094</b>              | <b>3.73</b>  |
| Obs.                 | 3,187,164              |               | 3,187,164                    |              | 1,595,120           |               | 1,595,120                 |              |
| R-square             | 0.094                  |               | 0.093                        |              | 0.078               |               | 0.076                     |              |
| F-value              | 220.11                 |               | 218.24                       |              | 298.07              |               | 224.00                    |              |

| <b>Measure 15-100</b> | d in adj. share | t-values      | d in adj. share | t-values      | d in adj. share | t-values      | d in adj. share | t-values     |
|-----------------------|-----------------|---------------|-----------------|---------------|-----------------|---------------|-----------------|--------------|
| News                  | <b>0.005</b>    | <b>79.50</b>  | <b>0.004</b>    | <b>67.55</b>  | <b>-0.001</b>   | <b>-14.20</b> | <b>-0.0002</b>  | <b>-3.29</b> |
| First pos             | <b>-0.176</b>   | <b>-13.55</b> | <b>0.066</b>    | <b>5.61</b>   | <b>0.006</b>    | <b>2.30</b>   | -0.034          | -1.21        |
| First neg             | <b>0.077</b>    | <b>43.99</b>  | <b>-0.032</b>   | <b>-15.27</b> | <b>-0.055</b>   | <b>-31.46</b> | 0.011           | 1.20         |
| News*First pos        | <b>0.041</b>    | <b>12.91</b>  | <b>-0.041</b>   | <b>-7.07</b>  | <b>0.012</b>    | <b>16.00</b>  | 0.000           | .            |
| News*First neg        | <b>-0.019</b>   | <b>-50.66</b> | <b>-0.003</b>   | <b>-10.12</b> | <b>0.004</b>    | <b>15.56</b>  | <b>-0.014</b>   | <b>-4.25</b> |
| Obs.                  | 3,187,164       |               | 3,187,164       |               | 1,595,120       |               | 1,595,120       |              |
| R-square              | 0.094           |               | 0.093           |               | 0.077           |               | 0.076           |              |
| F-value               | 219.87          |               | 218.48          |               | 202.09          |               | 224.19          |              |

| <b>Measure 15-150</b> | d in adj. share | t-values      | d in adj. share | t-values      | d in adj. share | t-values      | d in adj. share | t-values     |
|-----------------------|-----------------|---------------|-----------------|---------------|-----------------|---------------|-----------------|--------------|
| News                  | <b>0.004</b>    | <b>75.27</b>  | <b>0.004</b>    | <b>71.74</b>  | <b>-0.001</b>   | <b>-13.50</b> | <b>-0.0002</b>  | <b>-3.50</b> |
| First pos             | <b>-0.132</b>   | <b>-23.95</b> | <b>-0.117</b>   | <b>-12.81</b> | <b>-0.015</b>   | <b>-5.62</b>  | -0.019          | -0.67        |
| First neg             | <b>0.035</b>    | <b>25.71</b>  | <b>0.092</b>    | <b>35.58</b>  | <b>-0.037</b>   | <b>-24.81</b> | -0.008          | -0.94        |
| News*First pos        | <b>0.031</b>    | <b>18.18</b>  | <b>-0.012</b>   | <b>-2.60</b>  | <b>0.013</b>    | <b>17.45</b>  | 0.000           | .            |
| News*First neg        | <b>-0.003</b>   | <b>-11.48</b> | <b>-0.017</b>   | <b>-55.37</b> | <b>0.003</b>    | <b>15.12</b>  | <b>-0.014</b>   | <b>-4.01</b> |
| Obs.                  | 3,187,164       |               | 3,187,164       |               | 1,595,120       |               | 1,595,120       |              |
| R-square              | 0.093           |               | 0.094           |               | 0.077           |               | 0.076           |              |
| F-value               | 218.18          |               | 222.01          |               | 205.32          |               | 223.82          |              |

**Table A5. Excluding the capital city**

The table shows results from the analyses excluding the firms located in Stockholm (the capital) and the individuals who live in Stockholm. The sample covering news republished in the next quarter in different locations is used (see Table 3 in the paper). To save space, the results only from the dependent variable, change in adjusted share are shown, although all the regressions include the intercept, control variables, district and time fixed effects. Standard errors are clustered on district and time. The bold marked coefficients (and t-values) are significant at the 5% level.

| <b>Local stocks</b> | First news is national |               | National news is republished |               | First news is local |               | Local news is republished |              |
|---------------------|------------------------|---------------|------------------------------|---------------|---------------------|---------------|---------------------------|--------------|
|                     | d in adj. share        | t-values      | d in adj. share              | t-values      | d in adj. share     | t-values      | d in adj. share           | t-values     |
| News                | <b>-0.003</b>          | <b>-18.46</b> | <b>-0.002</b>                | <b>-13.07</b> | <b>-0.009</b>       | <b>-22.99</b> | <b>-0.0008</b>            | <b>-3.30</b> |
| First pos           | <b>-0.158</b>          | <b>-25.91</b> | <b>0.085</b>                 | <b>7.18</b>   | <b>-0.051</b>       | <b>-5.68</b>  | <b>0.1076</b>             | <b>10.93</b> |
| First neg           | <b>0.013</b>           | <b>5.31</b>   | <b>-0.061</b>                | <b>-24.00</b> | <b>-0.148</b>       | <b>-26.15</b> | <b>-0.041</b>             | <b>-9.00</b> |
| News*First pos      | <b>0.048</b>           | <b>26.29</b>  | <b>-0.057</b>                | <b>-7.53</b>  | <b>0.009</b>        | <b>2.55</b>   | <b>-0.012</b>             | <b>-5.91</b> |
| News*First neg      | <b>-0.004</b>          | <b>-7.14</b>  | <b>-0.004</b>                | <b>-13.78</b> | <b>0.013</b>        | <b>23.81</b>  | <b>0.008</b>              | <b>10.25</b> |
| Obs.                | 813,715                |               | 813,715                      |               | 418,921             |               | 418,921                   |              |
| R-square            | 0.090                  |               | 0.093                        |               | 0.147               |               | 0.314                     |              |
| F-value             | 522.84                 |               | 521.86                       |               | 243.86              |               | 304.04                    |              |

  

| <b>Non-local stocks</b> | First news is national |               | National news is republished |               | First news is local |               | Local news is republished |               |
|-------------------------|------------------------|---------------|------------------------------|---------------|---------------------|---------------|---------------------------|---------------|
|                         | d in adj. share        | t-values      | d in adj. share              | t-values      | d in adj. share     | t-values      | d in adj. share           | t-values      |
| News                    | <b>-0.003</b>          | <b>-35.25</b> | <b>-0.002</b>                | <b>-17.90</b> | <b>-0.009</b>       | <b>-68.03</b> | <b>-0.0031</b>            | <b>-30.25</b> |
| First pos               | -0.003                 | -0.81         | <b>0.039</b>                 | <b>6.03</b>   | <b>-0.107</b>       | <b>-30.99</b> | <b>0.1502</b>             | <b>29.98</b>  |
| First neg               | <b>-0.043</b>          | <b>-26.67</b> | <b>-0.026</b>                | <b>-19.62</b> | <b>-0.116</b>       | <b>-79.66</b> | <b>-0.069</b>             | <b>-40.72</b> |
| News*First pos          | <b>0.031</b>           | <b>31.66</b>  | <b>-0.039</b>                | <b>-9.11</b>  | <b>0.053</b>        | <b>44.43</b>  | <b>-0.010</b>             | <b>-9.38</b>  |
| News*First neg          | <b>0.002</b>           | <b>6.78</b>   | <b>-0.002</b>                | <b>-9.69</b>  | <b>0.008</b>        | <b>41.82</b>  | <b>0.014</b>              | <b>43.16</b>  |
| Obs.                    | 2,235,422              |               | 2,235,422                    |               | 1,303,258           |               | 1,303,258                 |               |
| R-square                | 0.099                  |               | 0.097                        |               | 0.145               |               | 0.139                     |               |
| F-value                 | 668.06                 |               | 648.73                       |               | 268.57              |               | 246.98                    |               |

**Table A6. Cross regional differences in tone and the change in portfolio holdings**

The table shows the effects when the same news event is republished across regions and when it is republished in the same region. All the regressions include the main effects, control variables, district fixed effects, and time fixed effects, but the results from these variables are omitted to save space. The main variables of interest are the interaction effects. Standard errors are clustered on district and time. The unit of analysis is investor-time as the tables shows changes in local and non-local investors portfolio holdings separately. The bold marked coefficients (and t-values) are significant at the 5% level.

|                        | Locals          |                 |                 | Non-locals      |                 |                 |
|------------------------|-----------------|-----------------|-----------------|-----------------|-----------------|-----------------|
|                        | d in share      | d in adj. share | d in value      | d in share      | d in adj. share | d in value      |
| News                   | <b>-0.0002</b>  | <b>-0.0002</b>  | <b>-0.0003</b>  | <b>-0.0002</b>  | <b>-0.0002</b>  | <b>-0.0002</b>  |
| t-stat                 | <b>-30.46</b>   | <b>-30.55</b>   | <b>-56.91</b>   | <b>-94.81</b>   | <b>-97.17</b>   | <b>-114.49</b>  |
| News L1                | <b>0.00005</b>  | <b>0.0001</b>   | <b>0.0001</b>   | <b>0.00005</b>  | <b>0.0001</b>   | <b>0.0001</b>   |
| t-stat                 | <b>21.96</b>    | <b>21.83</b>    | <b>26.56</b>    | <b>39.59</b>    | <b>41.39</b>    | <b>48.8</b>     |
| News*First neg         | <b>-0.0003</b>  | <b>-0.0003</b>  | <b>-0.0003</b>  | <b>-0.001</b>   | <b>-0.001</b>   | <b>-0.001</b>   |
| t-stat                 | <b>-25.64</b>   | <b>-17.11</b>   | <b>-24.55</b>   | <b>-62.77</b>   | <b>-49.35</b>   | <b>-75.08</b>   |
| News*First pos         | <b>0.0001</b>   | <b>0.0002</b>   | <b>0.00004</b>  | <b>0.0001</b>   | <b>0.0002</b>   | <b>0.0002</b>   |
| t-stat                 | <b>6.85</b>     | <b>11.62</b>    | <b>2.79</b>     | <b>18.67</b>    | <b>21.33</b>    | <b>24.52</b>    |
| News*Across neg        | <b>0.0000</b>   | <b>0.0001</b>   | <b>0.0001</b>   | <b>0.00002</b>  | <b>0.00003</b>  | <b>0.0001</b>   |
| t-stat                 | <b>-0.65</b>    | <b>6.36</b>     | <b>15.16</b>    | <b>5.44</b>     | <b>6.82</b>     | <b>19.29</b>    |
| News*Across pos        | <b>0.0001</b>   | <b>0.0001</b>   | <b>0.0001</b>   | <b>0.0002</b>   | <b>0.0001</b>   | <b>0.0002</b>   |
| t-stat                 | <b>20.01</b>    | <b>16.84</b>    | <b>18.87</b>    | <b>29.24</b>    | <b>19.19</b>    | <b>27.73</b>    |
| News*Same neg          | -0.00001        | <b>-0.00006</b> | <b>-0.00002</b> | 0.00000         | <b>-0.00002</b> | <b>-0.00002</b> |
| t-stat                 | -1.45           | <b>-6.60</b>    | <b>-3.58</b>    | 0.860           | <b>-4.300</b>   | <b>-4.020</b>   |
| News*Same pos          | <b>-0.00013</b> | <b>-0.00019</b> | <b>-0.00005</b> | <b>0.00001</b>  | 0.00001         | <b>0.00010</b>  |
| t-stat                 | <b>-13.80</b>   | <b>-16.87</b>   | <b>-4.98</b>    | <b>2.26</b>     | 1.25            | <b>19.70</b>    |
| News*First local neg   | <b>-0.00001</b> | <b>-0.00004</b> | <b>-0.00007</b> | <b>-0.00002</b> | <b>-0.00005</b> | <b>-0.00009</b> |
| t-stat                 | <b>-2.32</b>    | <b>-7.67</b>    | <b>-16.88</b>   | <b>-8.00</b>    | <b>-16.04</b>   | <b>-39.12</b>   |
| News*First local pos   | 0.00002         | <b>-0.00004</b> | -0.00001        | <b>0.00004</b>  | <b>0.00003</b>  | <b>0.0001</b>   |
| t-stat                 | 1.56            | <b>-3.08</b>    | -1.27           | <b>7.29</b>     | <b>5.61</b>     | <b>10.27</b>    |
| News*Same local neg    | <b>-0.0001</b>  | <b>-0.0001</b>  | <b>-0.0001</b>  | <b>-0.0001</b>  | <b>-0.0001</b>  | <b>-0.00003</b> |
| t-stat                 | <b>-14.22</b>   | <b>-14.91</b>   | <b>-18.89</b>   | <b>-31.66</b>   | <b>-26.84</b>   | <b>-16.21</b>   |
| News*Same local pos    | 0.0000          | <b>0.0001</b>   | <b>0.0004</b>   | <b>0.00002</b>  | <b>0.00003</b>  | <b>0.00002</b>  |
| t-stat                 | 0.89            | <b>2.49</b>     | <b>14.17</b>    | <b>2.01</b>     | <b>2.66</b>     | <b>2.18</b>     |
| News*Across local neg  | <b>0.0001</b>   | <b>0.0001</b>   | <b>0.0000</b>   | <b>0.0001</b>   | <b>0.0001</b>   | <b>0.00004</b>  |
| t-stat                 | <b>25.08</b>    | <b>25.56</b>    | <b>18.68</b>    | <b>49.48</b>    | <b>50.94</b>    | <b>37.81</b>    |
| News*Across local pos  | <b>0.00001</b>  | <b>0.00004</b>  | <b>0.00003</b>  | <b>0.00002</b>  | <b>0.00004</b>  | <b>0.00001</b>  |
| t-stat                 | <b>2.13</b>     | <b>5.73</b>     | <b>6.44</b>     | <b>5.84</b>     | <b>11.58</b>    | <b>6.95</b>     |
| Intercept              | <b>0.326</b>    | <b>0.355</b>    | <b>0.977</b>    | <b>0.205</b>    | <b>0.170</b>    | <b>1.014</b>    |
| t-stat                 | <b>15.31</b>    | <b>13.35</b>    | <b>43.62</b>    | <b>21.91</b>    | <b>14.04</b>    | <b>104.44</b>   |
| Control variables      | Yes             | Yes             | Yes             | Yes             | Yes             | Yes             |
| District fixed effects | Yes             | Yes             | Yes             | Yes             | Yes             | Yes             |
| Time fixed effects     | Yes             | Yes             | Yes             | Yes             | Yes             | Yes             |
| Obs.                   | 7,640,267       | 7,640,267       | 7,640,267       | 19,207,278      | 19,207,278      | 19,207,278      |
| R-square               | 0.07            | 0.08            | 0.09            | 0.07            | 0.08            | 0.09            |
| F-value                | 100.44          | 101.80          | 171.59          | 143.58          | 136.39          | 144.30          |

**Table A7. Additional news categories and the change in portfolio holdings**

The table shows the effects of news tone in different news categories on trading activity. The unit of analysis is investor-time as the tables show results from local and non-local investors' portfolios separately. Web news and printed news as well as their interactions with news tone are included in the models. Local portion of the investor portfolio is studied by the variable logarithm of local value. All the regressions include the main effects, control variables, district fixed effects, and time fixed effects but the results from these variables are omitted to save space. The main variables of interest are the interaction effects. Standard errors are clustered on district and time. The bold marked coefficients (and t-value) are significant at the 5% level.

|                                   | d in share     | d in adj. share | d in value      |
|-----------------------------------|----------------|-----------------|-----------------|
| News                              | <b>-0.0005</b> | <b>-0.0005</b>  | <b>-0.0004</b>  |
| t-stat                            | <b>-192.60</b> | <b>-193.50</b>  | <b>-185.41</b>  |
| News L1                           | <b>0.0005</b>  | <b>0.0005</b>   | <b>0.0004</b>   |
| t-stat                            | <b>198.76</b>  | <b>195.6</b>    | <b>196.17</b>   |
| Log local value                   | <b>-0.052</b>  | <b>-0.062</b>   | <b>-0.055</b>   |
| t-stat                            | <b>-139.64</b> | <b>-131.25</b>  | <b>-159.18</b>  |
| News*Local neg                    | <b>0.0001</b>  | <b>0.0001</b>   | <b>0.0005</b>   |
| t-stat                            | <b>2.15</b>    | <b>1.98</b>     | <b>13.78</b>    |
| News*Local pos                    | <b>-0.0001</b> | <b>-0.0002</b>  | <b>-0.0005</b>  |
| t-stat                            | <b>-2.72</b>   | <b>-7.45</b>    | <b>-18.78</b>   |
| News*National neg                 | <b>-0.001</b>  | <b>-0.001</b>   | <b>-0.002</b>   |
| t-stat                            | <b>-10.40</b>  | <b>-5.96</b>    | <b>-14.42</b>   |
| News*National pos                 | -0.00003       | 0.00006         | <b>0.00044</b>  |
| t-stat                            | -0.58          | 1.020           | <b>6.14</b>     |
| News*Local neg*Log local value    | <b>0.00001</b> | <b>0.00001</b>  | <b>0.00004</b>  |
| t-stat                            | <b>2.00</b>    | <b>1.89</b>     | <b>12.29</b>    |
| News*Local pos*Log local value    | <b>0.00001</b> | <b>0.00003</b>  | <b>0.00004</b>  |
| t-stat                            | <b>5.17</b>    | <b>9.77</b>     | <b>18.09</b>    |
| News*National neg*Log local value | <b>0.0002</b>  | <b>0.0002</b>   | <b>0.0001</b>   |
| t-stat                            | <b>16.12</b>   | <b>10.63</b>    | <b>9.95</b>     |
| News*National pos*Log local value | 0.0000         | 0.0000          | <b>-0.00002</b> |
| t-stat                            | 0.28           | -1.08           | <b>-3.09</b>    |
| News*First neg                    | <b>-0.0004</b> | <b>-0.0004</b>  | <b>-0.0006</b>  |
| t-stat                            | <b>-9.64</b>   | <b>-8.40</b>    | <b>-17.83</b>   |
| News*First post                   | <b>-0.0001</b> | <b>-0.0001</b>  | <b>-0.0003</b>  |
| t-stat                            | <b>-4.57</b>   | <b>-4.83</b>    | <b>-22.90</b>   |
| News*Following neg                | <b>-0.0001</b> | <b>-0.0001</b>  | <b>-0.0001</b>  |
| t-stat                            | <b>-10.16</b>  | <b>-12.64</b>   | <b>-5.95</b>    |
| News*Following pos                | <b>-0.0001</b> | <b>-0.0001</b>  | <b>-0.00005</b> |
| t-stat                            | <b>-8.88</b>   | <b>-7.99</b>    | <b>-3.24</b>    |
| News*Print neg                    | <b>0.0002</b>  | <b>0.0001</b>   | <b>0.0001</b>   |
| t-stat                            | <b>25.96</b>   | <b>9.39</b>     | <b>8.11</b>     |
| News*Print pos                    | 0.00002        | <b>0.00015</b>  | <b>0.00006</b>  |
| t-stat                            | 1.83           | <b>10.59</b>    | <b>5.86</b>     |
| News*Web neg                      | <b>0.0002</b>  | <b>0.0001</b>   | <b>0.0002</b>   |
| t-stat                            | <b>10.34</b>   | <b>2.60</b>     | <b>12.82</b>    |
| News*Web pos                      | <b>-0.0001</b> | <b>-0.0001</b>  | <b>-0.0001</b>  |
| t-stat                            | <b>-7.17</b>   | <b>-7.42</b>    | <b>-8.06</b>    |
| Intercept                         | <b>-0.449</b>  | <b>-0.433</b>   | <b>-0.298</b>   |
| t-stat                            | <b>-20.45</b>  | <b>-16.34</b>   | <b>-11.61</b>   |
| Main Effects                      | Yes            | Yes             | Yes             |
| Control variables                 | Yes            | Yes             | Yes             |
| District fixed effects            | Yes            | Yes             | Yes             |
| Time fixed effects                | Yes            | Yes             | Yes             |
| Obs.                              | 9,699,807      | 9,699,807       | 9,699,807       |
| R-square                          | 0.14           | 0.14            | 0.14            |
| F-value                           | 209.76         | 213.41          | 344.57          |

**Table A8. News dispersion in tone across regions and the change in portfolio holdings**

The tables show the effects of dispersion in tone across regions on the change in portfolio holdings. All the regressions include control variables, district fixed effects, and time fixed effects. Standard errors are clustered on district and time. The unit of analysis is at investor-time level. The bold marked coefficients (and t-values) are significant at the 5% level.

|                                      | d in share      | d in adj. share | d in value      |
|--------------------------------------|-----------------|-----------------|-----------------|
| News                                 | <b>-0.00005</b> | <b>-0.00008</b> | <b>-0.00003</b> |
| t-stat                               | <b>-10.88</b>   | <b>-15.63</b>   | <b>-6.71</b>    |
| News L1                              | <b>0.00002</b>  | <b>0.00004</b>  | <b>0.00002</b>  |
| t-stat                               | <b>12.33</b>    | <b>16.17</b>    | <b>10.99</b>    |
| Dispersion in tone first             | <b>-0.017</b>   | <b>-0.006</b>   | <b>-0.048</b>   |
| t-stat                               | <b>-7.29</b>    | <b>-2.13</b>    | <b>-22.70</b>   |
| Dispersion in tone same              | 0.003           | <b>0.029</b>    | <b>0.035</b>    |
| t-stat                               | 1.05            | <b>8.91</b>     | <b>15.37</b>    |
| Dispersion in tone across            | <b>-0.018</b>   | <b>-0.025</b>   | <b>-0.044</b>   |
| t-stat                               | <b>-8.10</b>    | <b>-8.58</b>    | <b>-22.20</b>   |
| Dispersion in tone first local       | <b>0.059</b>    | <b>0.044</b>    | <b>0.065</b>    |
| t-stat                               | <b>22.75</b>    | <b>13.00</b>    | <b>26.03</b>    |
| Dispersion in tone same local        | <b>-0.018</b>   | <b>-0.033</b>   | <b>-0.004</b>   |
| t-stat                               | <b>-2.26</b>    | <b>-3.25</b>    | <b>-0.61</b>    |
| Dispersion in tone across local      | <b>0.057</b>    | <b>0.044</b>    | <b>0.048</b>    |
| t-stat                               | <b>19.51</b>    | <b>11.77</b>    | <b>18.64</b>    |
| News*Dispersion in tone first        | <b>-0.0001</b>  | <b>-0.0001</b>  | <b>-0.0001</b>  |
| t-stat                               | <b>-10.35</b>   | <b>-8.62</b>    | <b>-12.26</b>   |
| News*Dispersion in tone same         | <b>-0.0001</b>  | <b>-0.0001</b>  | <b>-0.0001</b>  |
| t-stat                               | <b>-8.36</b>    | <b>-12.94</b>   | <b>-9.94</b>    |
| News*Dispersion in tone across       | <b>-0.00001</b> | 0.000           | 0.000           |
| t-stat                               | <b>-2.41</b>    | -0.07           | -0.72           |
| News*Dispersion in tone first local  | <b>-0.0001</b>  | <b>-0.0001</b>  | <b>-0.0001</b>  |
| t-stat                               | <b>-21.23</b>   | <b>-9.06</b>    | <b>-17.46</b>   |
| News*Dispersion in tone same local   | <b>0.00004</b>  | 0.000           | 0.000           |
| t-stat                               | <b>2.50</b>     | -0.03           | 0.75            |
| News*Dispersion in tone across local | 0.000           | 0.000           | 0.000           |
| t-stat                               | -1.25           | 1.62            | -0.81           |
| Intercept                            | <b>0.349</b>    | 0.328           | <b>0.847</b>    |
| t-stat                               | <b>1.52</b>     | 1.45            | <b>2.72</b>     |
| Control variables                    | Yes             | Yes             | Yes             |
| District fixed effects               | Yes             | Yes             | Yes             |
| Time fixed effects                   | Yes             | Yes             | Yes             |
| Obs.                                 | 5,346,257       | 5,346,257       | 5,346,257       |
| R-square                             | 0.09            | 0.11            | 0.13            |
| F-value                              | 174.11          | 183.63          | 196.73          |

**Table A9. Placebo tests on trading activity**

The table shows results from four different placebo tests on trading activity. In all the analyses control variables, district fixed effects, and time fixed effects are included in the regressions but their results are not shown to save space. Standard errors are clustered on district and time. The analysis in **Placebo 25p (Placebo 50p)** regressions are based on the sample that news is republished in the next quarter in different locations. Non-news observations are selected and 25 (50) percent of these observations are randomly assigned as news. The analysis in **Placebo 25p (0,-3 days)** regressions are based on the sample that collects all the non-news observations between 3 days before a quarter end and at the quarter end. It then randomly assigns 25 percent of these non-news observations as news. Finally, the analysis in **Placebo 50p (0,-3 days)** randomly assigns 50 percent of the non-news observations as news in the same sample. The bold marked coefficients (and t-values) are significant at the 5% level.

| Obs. 627,046,70               | d in share   | t-values     | d in adj. share | t-values     | d in value   | t-values      |
|-------------------------------|--------------|--------------|-----------------|--------------|--------------|---------------|
| Intercept                     | <b>0.175</b> | <b>78.18</b> | <b>0.124</b>    | <b>61.42</b> | <b>0.126</b> | <b>127.40</b> |
| <b>Placebo 25p</b>            | 0.0001       | 1.36         | 0.00004         | 0.35         | 0.0005       | 1.10          |
| R-square                      | 0.080        |              | 0.085           |              | 0.126        |               |
| F-value                       | 176.00       |              | 193.70          |              | 563.60       |               |
| <hr/>                         |              |              |                 |              |              |               |
| Obs. 627,046,70               |              |              |                 |              |              |               |
| Intercept                     | <b>0.175</b> | <b>78.18</b> | <b>0.124</b>    | <b>61.41</b> | <b>0.264</b> | <b>127.38</b> |
| <b>Placebo50p</b>             | 0.00002      | 0.21         | 0.00001         | 0.14         | 0.0001       | 1.02          |
| R-square                      | 0.080        |              | 0.085           |              | 0.126        |               |
| F-value                       | 176.90       |              | 193.60          |              | 563.50       |               |
| <hr/>                         |              |              |                 |              |              |               |
| Obs. 598,655,01               |              |              |                 |              |              |               |
| Intercept                     | <b>0.104</b> | <b>41.72</b> | <b>0.078</b>    | <b>38.14</b> | <b>0.233</b> | <b>103.69</b> |
| <b>Placebo 25p (0,-3days)</b> | 0.00003      | 0.35         | 0.00007         | 0.60         | 0.00001      | 0.06          |
| R-square                      | 0.083        |              | 0.090           |              | 0.133        |               |
| F-value                       | 173.40       |              | 190.00          |              | 518.00       |               |
| <hr/>                         |              |              |                 |              |              |               |
| Obs. 598,655,01               |              |              |                 |              |              |               |
| Intercept                     | <b>0.104</b> | <b>41.70</b> | <b>0.078</b>    | <b>38.13</b> | <b>0.233</b> | <b>103.64</b> |
| <b>Placebo 50p (0,-3days)</b> | 0.00005      | 0.60         | -0.00004        | -0.45        | 0.0001       | 1.34          |
| R-square                      | 0.083        |              | 0.090           |              | 0.133        |               |
| F-value                       | 173.30       |              | 190.60          |              | 519.00       |               |

**Table A10. The common trends tests on the event study**

The table shows results from the test of the common trends assumption in event studies. Dependent variable is the cumulative abnormal returns (CARs). The results are shown for all news and each news category separately. The results from the F-test, that all the lead event coefficients are zero, are also presented at the bottom of each column. The bold marked coefficients (and t-values) are significant at the 5% level.

| Event                  | CARs                           | CARs                         | CARs                           |
|------------------------|--------------------------------|--------------------------------|--------------------------------|--------------------------------|--------------------------------|--------------------------------|--------------------------------|------------------------------|--------------------------------|
|                        | All news                       | fist loc<br>pos                | fist loc<br>neg                | first nat<br>pos               | first nat<br>neg               | repub. loc<br>neg              | repub. loc<br>pos              | repub. nat<br>pos            | repub. nat<br>neg              |
| lag1 news              | <b>-0.0005</b><br><b>-2.94</b> | <b>-0.0010</b><br><b>-2.91</b> | -0.0003<br>-1.21               | -0.0003<br>-1.27               | <b>-0.0006</b><br><b>-3.42</b> | -0.0003<br>-0.57               | 0.0001<br>0.13                 | -0.0004<br>-1.12             | <b>-0.0008</b><br><b>-2.59</b> |
| lag2 news              | 0.0011<br>1.23                 | -0.0001<br>-0.33               | -0.0002<br>-1.19               | <b>-0.0006</b><br><b>-2.01</b> | 0.0021<br>1.26                 | <b>-0.0008</b><br><b>-2.43</b> | <b>-0.0007</b><br><b>-2.00</b> | -0.0004<br>-1.64             | 0.0018<br>0.95                 |
| lag3 news              | 0.0008<br>0.96                 | 0.0001<br>0.19                 | -0.0003<br>-1.07               | <b>-0.0005</b><br><b>-2.04</b> | 0.0017<br>1.07                 | <b>-0.0020</b><br><b>-3.18</b> | -0.0008<br>-1.17               | -0.0004<br>-1.01             | 0.0011<br>0.6                  |
| lag4 news              | 0.0002<br>0.24                 | -0.0002<br>-0.37               | -0.0007<br>-1.94               | <b>-0.0006</b><br><b>-3.36</b> | 0.0010<br>0.62                 | <b>-0.0025</b><br><b>-3.11</b> | -0.0008<br>-0.89               | -0.0006<br>-1.06             | 0.0002<br>0.12                 |
| lag5 news              | -0.0005<br>-0.61               | -0.0009<br>-1.39               | <b>-0.0012</b><br><b>-2.66</b> | <b>-0.0012</b><br><b>-4.84</b> | 0.00001<br>0.01                | <b>-0.0024</b><br><b>-2.57</b> | -0.0012<br>-1.16               | -0.0002<br>-0.33             | -0.0010<br>-0.57               |
| lag6 news              | -0.0014<br>-1.63               | -0.0012<br>-1.56               | <b>-0.0020</b><br><b>-3.37</b> | <b>-0.0024</b><br><b>-6.89</b> | -0.0012<br>-0.71               | <b>-0.0034</b><br><b>-3.25</b> | -0.0018<br>-1.44               | -0.0010<br>-1.21             | -0.0021<br>-1.15               |
| news                   | <b>0.0033</b><br><b>11.42</b>  | <b>0.0044</b><br><b>7.05</b>   | <b>0.0010</b><br><b>2.77</b>   | <b>0.0061</b><br><b>11</b>     | <b>0.0020</b><br><b>6.62</b>   | <b>0.0009</b><br><b>2.11</b>   | <b>0.0053</b><br><b>5.09</b>   | <b>0.0069</b><br><b>9.01</b> | <b>0.0018</b><br><b>4.02</b>   |
| lead1 news             | -0.0011<br>-1.23               | 0.0005<br>0.6                  | -0.0019<br>-1.88               | -0.0011<br>-1.93               | -0.0010<br>-0.6                | -0.00314<br>-0.98              | 0.0000<br>0.02                 | 0.0005<br>0.55               | -0.0021<br>-1.14               |
| lead2 news             | -0.0005<br>-0.59               | -0.0009<br>-1.16               | -0.0012<br>-0.47               | -0.0011<br>-0.13               | -0.0001<br>-0.06               | -0.0029<br>-1.05               | -0.0010<br>-0.95               | 0.0000<br>0.03               | -0.0011<br>-0.63               |
| lead3 news             | 0.0003<br>0.37                 | -0.0004<br>-0.58               | -0.0008<br>-1.85               | -0.0002<br>-1.01               | 0.0009<br>0.56                 | -0.0013<br>-1.54               | -0.0003<br>-0.3                | 0.0001<br>0.16               | 0.0000<br>0.02                 |
| lead4 news             | 0.0009<br>1.07                 | 0.0006<br>1.2                  | -0.0000<br>-0.05               | -0.0003<br>-1.17               | 0.0018<br>1.14                 | -0.0024<br>-1.23               | -0.0006<br>-0.75               | -0.0000<br>-0.1              | 0.0010<br>0.56                 |
| lead5 news             | 0.0013<br>1.46                 | 0.0006<br>1.52                 | -0.0002<br>-0.67               | 0.0000<br>0.12                 | 0.0023<br>1.37                 | -0.0008<br>-1.56               | -0.0008<br>-1.49               | -0.0001<br>-0.31             | 0.0017<br>0.93                 |
| lead6 news             | 0.0015<br>1.67                 | -                              | -                              | 0.0000                         | 0.0025                         | -                              | -                              | -                            | 0.0025<br>1.27                 |
| Obs.                   | 5,624,917                      | 102,183                        | 291,229                        | 330,179                        | 1,853,436                      | 49,208                         | 33,309                         | 134,397                      | 887,972                        |
| R-square               | 0.016                          | 0.074                          | 0.040                          | 0.041                          | 0.018                          | 0.113                          | 0.169                          | 0.060                        | 0.040                          |
| F-test of<br>Lead1-6=0 | 1.88                           | 0.92                           | 2.01                           | 2.08                           | 0.70                           | 1.39                           | 1.01                           | 0.24                         | 1.91                           |

**Table A11. Daily trade volume data, including institutional investors**

The table shows results from the analyses that relate all the news variables to the daily trade volume that includes both individual and institutional investors' trades. The trade volume on stocks is obtained from Bloomberg. The dependent variable in the regressions is the natural logarithm of trade volume. All the regressions include the intercept and main effects, but the results are shown from the interaction effects to save space. Standard errors are clustered on firm and date. The bold marked coefficients (and t-values) are significant at the 5% level.

|                     | Log volume    | t-values     |
|---------------------|---------------|--------------|---------------|--------------|---------------|--------------|---------------|--------------|
| News                | <b>0.010</b>  | <b>5.74</b>  | <b>0.008</b>  | <b>4.68</b>  | <b>0.008</b>  | <b>4.76</b>  | <b>0.004</b>  | <b>3.01</b>  |
| Lagged news         | <b>0.005</b>  | <b>3.43</b>  | <b>0.006</b>  | <b>4.66</b>  | <b>0.003</b>  | <b>2.38</b>  | <b>0.003</b>  | <b>2.42</b>  |
| News*First loc pos  | <b>0.041</b>  | <b>2.41</b>  | 0.017         | 1.05         | <b>0.049</b>  | <b>3.31</b>  | 0.020         | 1.35         |
| News*First nat pos  | <b>0.038</b>  | <b>4.43</b>  | <b>0.046</b>  | <b>5.94</b>  | <b>0.040</b>  | <b>5.15</b>  | <b>0.046</b>  | <b>6.49</b>  |
| News*First loc neg  | <b>-0.012</b> | <b>-2.14</b> | -0.006        | -0.96        | -0.006        | -1.16        | 0.002         | 0.30         |
| News*First nat neg  | <b>-0.020</b> | <b>-5.61</b> | <b>-0.012</b> | <b>-3.71</b> | <b>-0.015</b> | <b>-5.13</b> | <b>-0.011</b> | <b>-3.99</b> |
| News*Same loc pos   | <b>0.165</b>  | <b>3.78</b>  | <b>0.162</b>  | <b>3.81</b>  | <b>0.130</b>  | <b>3.86</b>  | <b>0.121</b>  | <b>3.52</b>  |
| News*Same nat pos   | <b>0.077</b>  | <b>5.43</b>  | <b>0.075</b>  | <b>5.72</b>  | <b>0.057</b>  | <b>4.32</b>  | <b>0.065</b>  | <b>5.28</b>  |
| News*Same loc neg   | -0.023        | -1.40        | -0.024        | -1.48        | -0.016        | -1.37        | -0.013        | -1.05        |
| News*Same nat neg   | <b>-0.017</b> | <b>-3.42</b> | <b>-0.013</b> | <b>-2.80</b> | <b>-0.016</b> | <b>-4.01</b> | <b>-0.013</b> | <b>-3.40</b> |
| News*Across loc pos | <b>0.182</b>  | <b>4.38</b>  | <b>0.128</b>  | <b>3.16</b>  | 0.051         | 1.37         | 0.028         | 0.73         |
| News*Across nat pos | <b>0.073</b>  | <b>2.71</b>  | <b>0.073</b>  | <b>2.71</b>  | <b>0.076</b>  | <b>3.37</b>  | <b>0.089</b>  | <b>3.89</b>  |
| News*Across loc neg | -0.004        | -0.20        | 0.000         | -0.01        | <b>0.030</b>  | <b>2.49</b>  | <b>0.027</b>  | <b>2.27</b>  |
| News*Across nat neg | 0.009         | 1.13         | 0.010         | 1.25         | -0.010        | -1.46        | -0.006        | -0.84        |
| Control variables   | No            |              | No            |              | Yes           |              | Yes           |              |
| Media district FE   | Yes           |              | No            |              | Yes           |              | No            |              |
| Firm district FE    | No            |              | Yes           |              | No            |              | Yes           |              |
| Obs.                | 367,463       |              | 419,078       |              | 247,234       |              | 289,322       |              |
| R-square            | 0.006         |              | 0.043         |              | 0.395         |              | 0.413         |              |
| F-value             | 26.76         |              | 76.96         |              | 224.67        |              | 266.82        |              |
